# Supplementary material for: Qi-Deficiency Related Increases in Disease Susceptibility Are Potentially Mediated by the Intestinal Microbiota
Source: Evid Based Complement Alternat Med. 2018 Oct 23;2018:1304397. doi: 10.1155/2018/1304397 (PMC6218746; doi:10.1155/2018/1304397)
Supplement: Supplemental Materials — Table S1. The information of primers. Table S2. Samples sequencing and alpha diversity of the intestinal microbiota. [file 1304397.f1.xls]

## Sheet: information of primers
Sample ID	Forward Primer	Forward Primer_seqence(967F 5--3）	Reverse Primer ID	Reverse Primer	Sample Name In Data
10	V4F_12GAAGA	GGACAGAGTGCCAGCMGCCGCGGTAA	V4R182TTATTCTCC	TTATTCTCCCCGGACTACHVGGGTWTCTAAT	PH.10
12	V4F_13AATCG	GAAGAGAGTGCCAGCMGCCGCGGTAA	V4R182TTATTCTCC	TTATTCTCCCCGGACTACHVGGGTWTCTAAT	PH.12
13	V4F_14TATAT	AATCGGAGTGCCAGCMGCCGCGGTAA	V4R182TTATTCTCC	TTATTCTCCCCGGACTACHVGGGTWTCTAAT	PH.13
14	V4F_15CCAGC	TATATGAGTGCCAGCMGCCGCGGTAA	V4R182TTATTCTCC	TTATTCTCCCCGGACTACHVGGGTWTCTAAT	PH.14
15	V4F_16TACCT	CCAGCGAGTGCCAGCMGCCGCGGTAA	V4R182TTATTCTCC	TTATTCTCCCCGGACTACHVGGGTWTCTAAT	PH.15
16	V4F_17ACATT	TACCTGAGTGCCAGCMGCCGCGGTAA	V4R182TTATTCTCC	TTATTCTCCCCGGACTACHVGGGTWTCTAAT	PH.16
17	V4F_18TGCAG	ACATTGAGTGCCAGCMGCCGCGGTAA	V4R182TTATTCTCC	TTATTCTCCCCGGACTACHVGGGTWTCTAAT	PH.17
18	V4F_19TCGTG	TGCAGGAGTGCCAGCMGCCGCGGTAA	V4R182TTATTCTCC	TTATTCTCCCCGGACTACHVGGGTWTCTAAT	PH.18
2	V4F_4TCTAC	GTAGTGAGTGCCAGCMGCCGCGGTAA	V4R182TTATTCTCC	TTATTCTCCCCGGACTACHVGGGTWTCTAAT	PH.2
3	V4F_5CAATA	TCTACGAGTGCCAGCMGCCGCGGTAA	V4R182TTATTCTCC	TTATTCTCCCCGGACTACHVGGGTWTCTAAT	PH.3
4	V4F_6GCGCT	CAATAGAGTGCCAGCMGCCGCGGTAA	V4R182TTATTCTCC	TTATTCTCCCCGGACTACHVGGGTWTCTAAT	PH.4
5	V4F_7CAACC	GCGCTGAGTGCCAGCMGCCGCGGTAA	V4R182TTATTCTCC	TTATTCTCCCCGGACTACHVGGGTWTCTAAT	PH.5
6	V4F_8AGCAT	CAACCGAGTGCCAGCMGCCGCGGTAA	V4R182TTATTCTCC	TTATTCTCCCCGGACTACHVGGGTWTCTAAT	PH.6
7	V4F_9ACTTG	AGCATGAGTGCCAGCMGCCGCGGTAA	V4R182TTATTCTCC	TTATTCTCCCCGGACTACHVGGGTWTCTAAT	PH.7
8	V4F_10GTGCG	ACTTGGAGTGCCAGCMGCCGCGGTAA	V4R182TTATTCTCC	TTATTCTCCCCGGACTACHVGGGTWTCTAAT	PH.8
9	V4F_11GGACA	GTGCGGAGTGCCAGCMGCCGCGGTAA	V4R182TTATTCTCC	TTATTCTCCCCGGACTACHVGGGTWTCTAAT	PH.9
21	V4F_21GGAGC	TGCTTGAGTGCCAGCMGCCGCGGTAA	V4R182TTATTCTCC	TTATTCTCCCCGGACTACHVGGGTWTCTAAT	QX.21
25	V4F_22ATAAT	GGAGCGAGTGCCAGCMGCCGCGGTAA	V4R182TTATTCTCC	TTATTCTCCCCGGACTACHVGGGTWTCTAAT	QX.25
27	V4F_23AGAGA	ATAATGAGTGCCAGCMGCCGCGGTAA	V4R182TTATTCTCC	TTATTCTCCCCGGACTACHVGGGTWTCTAAT	QX.27
29	V4F_24TAAGC	AGAGAGAGTGCCAGCMGCCGCGGTAA	V4R182TTATTCTCC	TTATTCTCCCCGGACTACHVGGGTWTCTAAT	QX.29
31	V4F_25CGATC	TAAGCGAGTGCCAGCMGCCGCGGTAA	V4R182TTATTCTCC	TTATTCTCCCCGGACTACHVGGGTWTCTAAT	QX.31
33	V4F_26GGCTC	CGATCGAGTGCCAGCMGCCGCGGTAA	V4R182TTATTCTCC	TTATTCTCCCCGGACTACHVGGGTWTCTAAT	QX.33
35	V4F_83CAGTC	TTGATGAGTGCCAGCMGCCGCGGTAA	V4R182TTATTCTCC	TTATTCTCCCCGGACTACHVGGGTWTCTAAT	QX.35
37	V4F_84CCACT	CAGTCGAGTGCCAGCMGCCGCGGTAA	V4R182TTATTCTCC	TTATTCTCCCCGGACTACHVGGGTWTCTAAT	QX.37
39	V4F_27GTGGC	GGCTCGAGTGCCAGCMGCCGCGGTAA	V4R182TTATTCTCC	TTATTCTCCCCGGACTACHVGGGTWTCTAAT	QX.39
41	V4F_28TACGA	GTGGCGAGTGCCAGCMGCCGCGGTAA	V4R182TTATTCTCC	TTATTCTCCCCGGACTACHVGGGTWTCTAAT	QX.41
43	V4F_29TGTGA	TACGAGAGTGCCAGCMGCCGCGGTAA	V4R182TTATTCTCC	TTATTCTCCCCGGACTACHVGGGTWTCTAAT	QX.43
45	V4F_30ACGGA	TGTGAGAGTGCCAGCMGCCGCGGTAA	V4R182TTATTCTCC	TTATTCTCCCCGGACTACHVGGGTWTCTAAT	QX.45
47	V4F_85CGTAC	CCACTGAGTGCCAGCMGCCGCGGTAA	V4R182TTATTCTCC	TTATTCTCCCCGGACTACHVGGGTWTCTAAT	QX.47
49	V4F_86TATGG	CGTACGAGTGCCAGCMGCCGCGGTAA	V4R182TTATTCTCC	TTATTCTCCCCGGACTACHVGGGTWTCTAAT	QX.49
53	V4F_88ACCAA	TTCGGGAGTGCCAGCMGCCGCGGTAA	V4R182TTATTCTCC	TTATTCTCCCCGGACTACHVGGGTWTCTAAT	QX.53
55	V4F_89TTATT	ACCAAGAGTGCCAGCMGCCGCGGTAA	V4R182TTATTCTCC	TTATTCTCCCCGGACTACHVGGGTWTCTAAT	QX.55
57	V4F_88ACCAA	TTCGGGAGTGCCAGCMGCCGCGGTAA	V4R183TTATTCAGG	TTATTCAGGCCGGACTACHVGGGTWTCTAAT	QX.57
59	V4F_89TTATT	ACCAAGAGTGCCAGCMGCCGCGGTAA	V4R183TTATTCAGG	TTATTCAGGCCGGACTACHVGGGTWTCTAAT	QX.59
61	V4F_90TTATT	TTATTGAGTGCCAGCMGCCGCGGTAA	V4R183TTATTCAGG	TTATTCAGGCCGGACTACHVGGGTWTCTAAT	QX.61

## Sheet: samples sequencing
Sample ID	rRNA Sequence Number	OTU Counts	Seqs/Sample	chao1 Ave.	observed species Ave.	shannon Ave.	simpson Ave.
PH.2	12008	5979	5820	1486.66	701.9	6.659	0.971
PH.3	11479	5992	5820	1247.52	667.9	6.238	0.958
PH.4	19121	6030	5820	1511.46	695.7	6.507	0.958
PH.5	10052	6062	5820	1535.39	703	6.473	0.947
PH.6	15824	5981	5820	1601.7	756.3	6.735	0.963
PH.7	11689	6045	5820	1317.04	593.7	5.86	0.949
PH.8	15067	6021	5820	1451.34	674.7	6.17	0.957
PH.9	13666	6050	5820	1495.02	699.9	6.324	0.954
PH.10	15552	6039	5820	1505.19	715.5	6.754	0.966
PH.12	16539	6068	5820	1340.9	567.4	5.045	0.861
PH.13	14381	5994	5820	1575.19	735.6	6.678	0.964
PH.14	11838	6138	5820	1110.02	511.5	5.332	0.914
PH.15	12940	6075	5820	1227.9	561.4	6.098	0.96
PH.16	12210	5881	5820	1467.89	778.1	6.865	0.97
PH.17	16838	6007	5820	1421.26	649.4	6.097	0.948
PH.18	9276	5825	5820	1634.51	810.6	6.88	0.97
QX.21	6311	6122	5820	1123.59	508.7	5.845	0.956
QX.25	6311	6025	5820	1358.48	678.8	6.412	0.961
QX.27	6311	6090	5820	1027.19	559.6	5.923	0.944
QX.29	6311	6082	5820	1752.68	670.1	6.583	0.955
QX.31	6311	6022	5820	1456.14	642.7	5.823	0.934
QX.33	6311	6131	5820	1211.52	509	5.276	0.895
QX.35	6311	5981	5820	1116.62	538.6	6.245	0.959
QX.37	6311	6193	5820	915.956	401.5	4.788	0.905
QX.39	6311	5938	5820	1244.54	658	5.744	0.916
QX.41	6311	5957	5820	1480.17	642.6	5.715	0.917
QX.43	6311	6011	5820	1350.25	656.7	6.104	0.941
QX.45	6311	5954	5820	1476.36	681.5	6.34	0.959
QX.47	6311	6151	5820	1024.23	501.3	5.479	0.922
QX.49	6311	6120	5820	1081.12	482.3	5.759	0.95
QX.53	6311	6123	5820	911.704	399.1	4.339	0.84
QX.55	6311	6181	5820	751.244	394.4	3.965	0.785
QX.57	6311	6123	5820	1053.32	417.9	4.729	0.88
QX.59	6311	6115	5820	1184.45	463	5.598	0.94
QX.61	6311	6158	5820	824.698	395.9	4.575	0.817
